# Supplementary material for: A 110 Year Sediment Record of Polycyclic Aromatic Hydrocarbons Related to Economic Development and Energy Consumption in Dongping Lake, North China
Source: MDPI journal article supplement (doi:10.3390/molecules26226828), 2021-11-11
Supplement: s1 [file s1]

# A 110-Year Sediment Record of Polycyclic Aromatic Hydrocarbons Related to the Economic Development and Energy Consumption in Dongping Lake, North China

Wei Guo <sup>1,\*</sup>, Junhui Yue <sup>1</sup>, Qian Zhao <sup>1</sup>, Jun Li <sup>1</sup>, Xiangyi Yu <sup>2</sup> and Yan Mao <sup>2,\*</sup>

<sup>1</sup> Key Laboratory of Beijing for Water Quality Science and Water Environment Recovery Engineering, Beijing University of Technology, Beijing 100124, China

<sup>2</sup> Solid Waste and Chemicals Management Center of MEE, Beijing, 100029, China

\* Correspondence: gwfybj@bjut.edu.cn (W. Guo); maoyan@meescc.cn (Y. Mao)

**Table S1.** Concentration of PAHs and total organic carbon (TOC) in sediment core from the Dongping Lake.

| Year | Naph  | Acep<br>h | Ace  | Flu  | Phen | Ant  | Fl   | Pyr  | BaA  | Chr  | BbF  | BkF  | BaP  | InP  | DBA  | BgP  | ΣPA<br>Hs | TOC  |
|------|-------|-----------|------|------|------|------|------|------|------|------|------|------|------|------|------|------|-----------|------|
|      | ng/g  | ng/g      | ng/g | ng/g | ng/g | ng/g | ng/g | ng/g | ng/g | ng/g | ng/g | ng/g | ng/g | ng/g | ng/g | ng/g | ng/g      | %    |
| 2016 | 182.1 | 9.0       | 47.6 | 4.2  | 35.1 | 18.1 | 35.1 | 17.3 | 2.9  | 0.9  | 11.1 | 5.9  | 11.5 | 25.5 | 2.8  | 15.3 | 424.5     | 1.47 |
| 2010 | 75.8  | 3.3       | 4.3  | 2.2  | 23.7 | 20.3 | 37.5 | 5.4  | 1.6  | 1.1  | 10.3 | 3.5  | 12.7 | 29.3 | 1.6  | 18.1 | 250.7     | 1.51 |
| 2006 | 359.1 | 17.2      | 5.5  | 2.3  | 56.3 | 24.2 | 76.9 | 16.6 | 1.8  | 1.5  | 9.4  | 3.1  | 11.3 | 25.0 | 2.4  | 15.4 | 628.0     | 1.89 |
| 1999 | 60.2  | 5.9       | 6.6  | 4.1  | 46.7 | 47.3 | 70.6 | 13.3 | 1.8  | 1.1  | 14.1 | 3.6  | 18.0 | 41.5 | 1.2  | 24.6 | 360.6     | 2.14 |
| 1993 | 76.1  | 8.4       | 4.8  | 2.6  | 42.2 | 22.0 | 69.9 | 12.9 | 1.6  | 1.4  | 7.7  | 2.9  | 12.9 | 32.7 | 2.5  | 17.4 | 318.0     | 1.61 |
| 1989 | 308.2 | 8.0       | 4.1  | 2.9  | 27.3 | 27.1 | 52.0 | 6.0  | 2.5  | 2.1  | 9.1  | 3.8  | 12.5 | 29.3 | 3.2  | 16.7 | 514.8     | 1.34 |
| 1984 | 88.1  | 10.0      | 7.8  | 4.1  | 43.2 | 26.1 | 67.5 | 13.0 | 2.1  | 0.9  | 9.6  | 2.1  | 12.7 | 29.7 | 2.1  | 15.8 | 334.8     | 1.27 |
| 1978 | 144.9 | 7.6       | 6.6  | 3.2  | 32.2 | 29.6 | 49.8 | 6.6  | 1.7  | 1.2  | 8.3  | 1.8  | 11.0 | 27.4 | 1.5  | 14.4 | 347.8     | 0.96 |
| 1973 | 91.0  | 5.3       | 3.3  | 2.0  | 23.0 | 20.9 | 41.7 | 4.4  | 1.3  | 0.8  | 7.4  | 1.6  | 10.9 | 26.1 | 1.2  | 13.7 | 254.6     | 0.88 |
| 1968 | 36.6  | nd        | nd   | nd   | 21.3 | 20.0 | 20.1 | 4.3  | nd   | nd   | 10.1 | nd   | 13.4 | 31.0 | nd   | 16.6 | 173.6     | 0.72 |
| 1963 | 28.9  | nd        | nd   | nd   | 22.3 | 19.8 | 17.6 | 5.8  | nd   | nd   | 10.5 | nd   | 13.6 | 30.5 | nd   | 17.3 | 166.2     | 0.77 |
| 1959 | 22.4  | nd        | nd   | nd   | 10.1 | 36.8 | 9.1  | 8.0  | nd   | nd   | 8.0  | nd   | 12.0 | 29.7 | nd   | 15.5 | 151.7     | 0.42 |
| 1955 | 39.7  | nd        | nd   | nd   | 13.1 | 19.8 | 14.8 | 8.4  | nd   | nd   | 8.4  | nd   | 11.1 | 26.2 | nd   | 13.6 | 155.0     | 0.59 |
| 1951 | 11.2  | nd        | nd   | nd   | 7.2  | 28.9 | 6.9  | 7.1  | nd   | nd   | 7.1  | nd   | 10.6 | 26.6 | nd   | 13.7 | 119.4     | 0.43 |
| 1948 | 26.8  | nd        | nd   | nd   | 3.6  | 26.1 | 4.1  | 6.6  | nd   | nd   | 6.6  | nd   | 10.4 | 25.0 | nd   | 13.0 | 122.1     | 0.55 |
| 1944 | 24.5  | nd        | nd   | nd   | 4.8  | 19.3 | 5.5  | 6.0  | nd   | nd   | 6.0  | nd   | 9.7  | 23.8 | nd   | 12.2 | 111.8     | 0.48 |
| 1941 | 6.4   | nd        | nd   | nd   | 4.8  | 24.3 | 4.5  | 5.6  | nd   | nd   | 5.6  | nd   | 8.4  | 21.2 | nd   | 11.0 | 91.9      | 0.52 |
| 1938 | 8.4   | nd        | nd   | nd   | 1.3  | 29.7 | 3.3  | 5.0  | nd   | nd   | 5.0  | nd   | 8.7  | 22.2 | nd   | 11.4 | 95.0      | 0.26 |
| 1935 | 5.6   | nd        | nd   | nd   | 10.7 | 36.2 | 4.5  | 6.1  | nd   | nd   | 6.1  | nd   | 9.2  | 22.2 | nd   | 11.4 | 112.1     | 0.35 |
| 1932 | 8.9   | nd        | nd   | nd   | 8.5  | 17.2 | 4.5  | 5.1  | nd   | nd   | 5.1  | nd   | 7.5  | 18.2 | nd   | 9.4  | 84.2      | 0.38 |
| 1929 | 8.0   | nd        | nd   | nd   | 7.1  | 35.5 | 4.1  | 4.8  | nd   | nd   | 4.8  | nd   | 7.5  | 18.2 | nd   | 9.3  | 99.3      | 0.35 |
| 1927 | 6.4   | nd        | nd   | nd   | 12.0 | 23.5 | 4.2  | 5.4  | nd   | nd   | 5.4  | nd   | 7.7  | 18.3 | nd   | 9.3  | 92.1      | 0.32 |
| 1924 | 7.1   | nd        | nd   | nd   | 3.4  | 19.2 | 3.9  | 4.4  | nd   | nd   | 4.4  | nd   | 7.4  | 18.4 | nd   | 9.4  | 77.6      | 0.21 |
| 1921 | 30.0  | nd        | nd   | nd   | 6.8  | 23.6 | 4.8  | 5.2  | nd   | nd   | 5.2  | nd   | 7.8  | 18.2 | nd   | 9.4  | 111.0     | 0.25 |
| 1919 | 37.4  | nd        | nd   | nd   | 21.5 | 13.2 | 25.6 | 7.1  | nd   | nd   | 7.1  | nd   | 8.6  | 19.2 | nd   | 10.4 | 150.0     | 0.28 |
| 1916 | 50.2  | nd        | nd   | nd   | 13.2 | 10.4 | 27.0 | 6.5  | nd   | nd   | 6.5  | nd   | 8.3  | 18.9 | nd   | 9.6  | 150.6     | 0.37 |
| 1914 | 48.6  | nd        | nd   | nd   | 13.9 | 12.7 | 21.0 | 6.0  | nd   | nd   | 6.0  | nd   | 8.2  | 18.8 | nd   | 10.0 | 145.3     | 0.32 |
| 1911 | 18.7  | nd        | nd   | nd   | 12.4 | 13.3 | 18.0 | 5.4  | nd   | nd   | 5.4  | nd   | 7.8  | 18.3 | nd   | 9.4  | 108.5     | 0.48 |
| 1909 | 13.5  | nd        | nd   | nd   | 10.8 | 13.3 | 18.4 | 5.9  | nd   | nd   | 5.9  | nd   | 7.5  | 18.7 | nd   | 9.9  | 103.9     | 0.31 |
| 1907 | 10.9  | nd        | nd   | nd   | 10.0 | 11.5 | 12.7 | 6.2  | nd   | nd   | 6.2  | nd   | 8.2  | 18.4 | nd   | 9.6  | 93.6      | 0.27 |

---

Naph, naphthalene; Aceph, acenaphthene; Ace, acenaphthylene; Flu, fluorene; Phen, phenanthrene; Ant, anthracene; Fl, fluoranthene; Pyr, pyrene; BaA, benz[a]anthracene; Chr, chrysene; BbF, benzo[b]fluoranthene; BkF, benzo[k]fluoranthene; BaP, benzo[a]pyrene; DBA, dibenz[ah]anthracene; BgP, benzo[ghi]perylene; InP, indeno[1,2,3-cd]pyrene; nd, not detected.
